# Supplementary material
Source: Springer Nature journal article supplement (https://www.springermedizin.de/resource/supplementary/12913_2006_583_MOESM2_ESM.pdf/9535388)

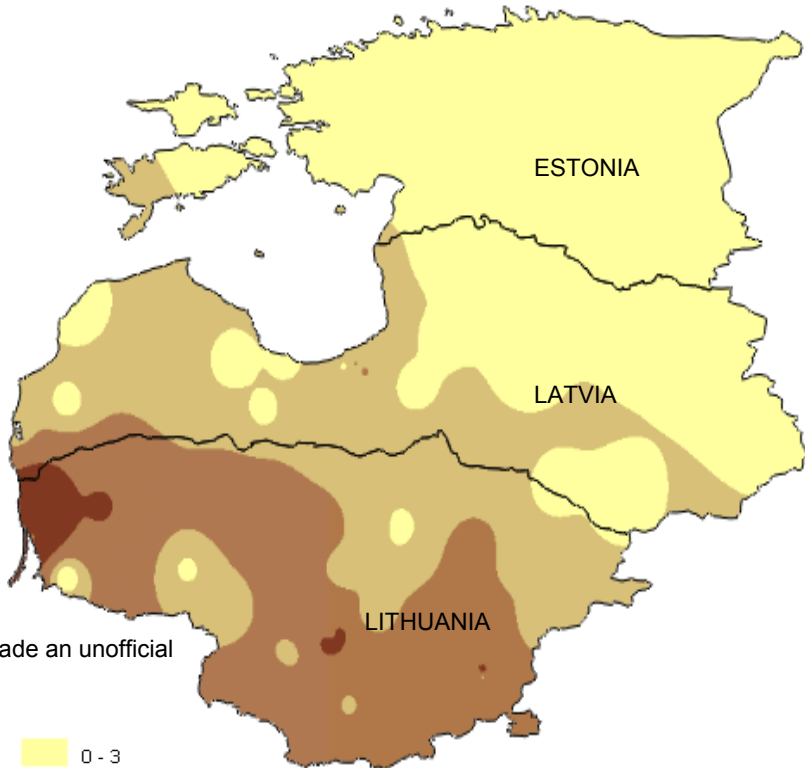

% who made an unofficial payment

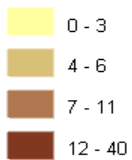

Supplement: MOESM2 [file 9535388]
